# Supplementary material for: Ganoderma lucidum methyl ganoderate E extends lifespan and modulates aging-related indicators in Caenorhabditis elegans
Source: Royal Society of Chemistry journal article supplement (doi:10.1039/d3fo04166b), 2023-12-01
Supplement: d3fo04166b1.pdf [file d3fo04166b1.pdf]

Supplementary figures

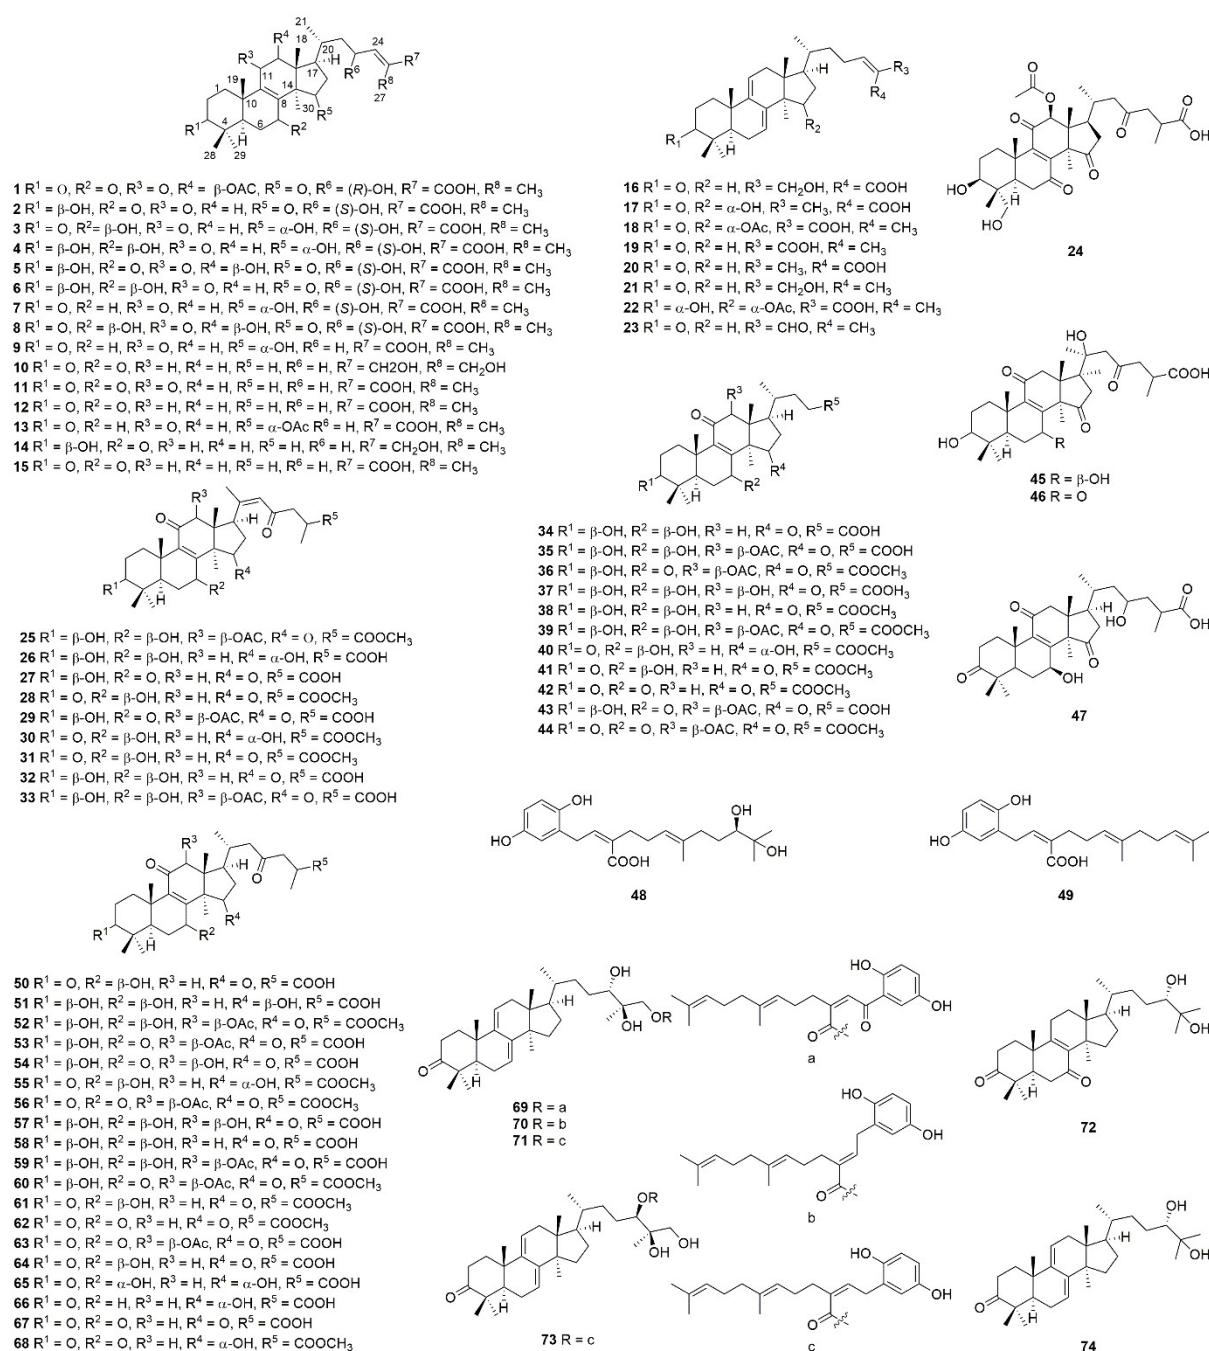

Figure S1. Compounds 1-74 isolated from *G. lucidum*<sup>1</sup>

References

1. B. Chen, et al, Triterpenes and meroterpenes from *Ganoderma lucidum* with inhibitory activity against HMGs reductase, aldose reductase and  $\alpha$ -glucosidase, *Fitoterapia* 2017, **120**, 6-16.
