# Supplementary material for: Ganoderma lucidum methyl ganoderate E extends lifespan and modulates aging-related indicators in Caenorhabditis elegans
Source: Royal Society of Chemistry journal article supplement (doi:10.1039/d3fo04166b), 2023-12-01
Supplement: d3fo04166b3.pdf [file d3fo04166b3.pdf]

**Table S1.** Lifespan parameters of different concentrations of LTJ-34 and LTJ-35

| Strains | Treatment          | Mean lifespan<br>± S.E.M | Percentage<br>lifespan<br>extension | Maximum<br>lifespan | Log-rank test     | n value |
|---------|--------------------|--------------------------|-------------------------------------|---------------------|-------------------|---------|
| N2      | Control            | 16                       |                                     | 28                  | -                 | 139     |
|         | LTJ-34 (5 µg/ml)   | 17                       | -                                   | 27                  | <i>P</i> > 0.05   | 137     |
|         | LTJ-35 (5 µg/ml)   | 16                       | -                                   | 27                  | <i>P</i> > 0.05   | 141     |
| N2      | Control            | 15                       |                                     | 28                  | -                 | 141     |
|         | LTJ-34 (10 µg/ml)  | 16                       | 7%                                  | 30                  | <i>P</i> < 0.01   | 143     |
|         | LTJ-35 (10 µg/ml)  | 19                       | 26%                                 | 35                  | <i>P</i> < 0.0001 | 144     |
| N2      | Control            | 14                       |                                     | 28                  | -                 | 148     |
|         | LTJ-34 (50 µg/ml)  | 14                       | -                                   | 23                  | <i>P</i> > 0.05   | 138     |
|         | LTJ-35 (50 µg/ml)  | 14                       | -                                   | 25                  | <i>P</i> > 0.05   | 144     |
|         | LTJ-34 (200 µg/ml) | 14                       | -                                   | 23                  | <i>P</i> > 0.05   | 144     |
|         | LTJ-35 (200 µg/ml) | 15                       | -                                   | 23                  | <i>P</i> > 0.05   | 143     |

Statistical significance of the difference between survival curves was determined by log-rank test using the Kaplan-Meier Survival analysis
