# Supplementary material for: Ganoderma lucidum methyl ganoderate E extends lifespan and modulates aging-related indicators in Caenorhabditis elegans
Source: Royal Society of Chemistry journal article supplement (doi:10.1039/d3fo04166b), 2023-12-01
Supplement: d3fo04166b4.pdf [file d3fo04166b4.pdf]

**Table S2.** Lifespan parameters of MGE on different strains

| Strains       | Treatment | Mean lifespan ± S.E.M | Change in mean lifespan (%) | Maximum lifespan | Log-rank test          | n value |
|---------------|-----------|-----------------------|-----------------------------|------------------|------------------------|---------|
| N2            | Control   | 15                    |                             | 26               | -                      | 364     |
|               | 10 µg/ml  | 19                    | 26.7%                       | 30               | $P < 0.0001$           | 360     |
|               | 20 µg/ml  | 19                    | 26.7%                       | 29               | $P < 0.0001$           | 382     |
| <i>Daf-16</i> | Control   | 13                    |                             | 22               |                        | 334     |
|               | 10 µg/ml  | 12                    | -                           | 22               | $P = 0.1578\text{ns}$  | 295     |
| <i>Hsf-1</i>  | Control   | 12                    |                             | 19               |                        | 331     |
|               | 10 µg/ml  | 12                    | -                           | 19               | $P = 0.3947\text{ns}$  | 332     |
| <i>Skn-1</i>  | Control   | 19                    |                             | 30               |                        | 235     |
|               | 10 µg/ml  | 19                    | -                           | 30               | $P = 0.3349\text{ ns}$ | 239     |

Statistical significance of the difference between survival curves was determined by log-rank test using the Kaplan-Meier Survival analysis
