# Supplementary material for: Ganoderma lucidum methyl ganoderate E extends lifespan and modulates aging-related indicators in Caenorhabditis elegans
Source: Royal Society of Chemistry journal article supplement (doi:10.1039/d3fo04166b), 2023-12-01
Supplement: d3fo04166b5.pdf [file d3fo04166b5.pdf]

**Table S3.** Genes differentially regulated by MGE

|    | Gene_ID (WormBase) | Pvalue      | log2FC       | regulated |
|----|--------------------|-------------|--------------|-----------|
| 1  | WBGene00045265     | 0.001735488 | -0.913968452 | down      |
| 2  | WBGene00001447     | 0.021775647 | -0.592156167 | down      |
| 3  | WBGene00008661     | 0.008475947 | 0.967918741  | up        |
| 4  | WBGene00013835     | 0.004824631 | 0.687803791  | up        |
| 5  | WBGene00009070     | 0.027306264 | -0.629075175 | down      |
| 6  | WBGene00019417     | 0.045556462 | -0.633981493 | down      |
| 7  | WBGene00009468     | 0.007451351 | 0.836777746  | up        |
| 8  | WBGene00015028     | 0.04365933  | 0.70483426   | up        |
| 9  | WBGene00045458     | 0.01427767  | -0.766189228 | down      |
| 10 | WBGene00011362     | 0.019397455 | -0.667540182 | down      |
| 11 | WBGene00011171     | 0.045838155 | 0.618171949  | up        |
| 12 | WBGene00006409     | 0.00831784  | 0.820148935  | up        |
| 13 | WBGene00013526     | 0.026818463 | -0.811245661 | down      |
| 14 | WBGene00016863     | 4.72E-06    | 1.522883229  | up        |
| 15 | WBGene00000669     | 0.042514422 | -0.676241028 | down      |
| 16 | WBGene00022951     | 0.000572964 | 0.919971904  | up        |
| 17 | WBGene00016437     | 0.00395306  | 0.86947091   | up        |
| 18 | WBGene00017909     | 0.001588294 | -0.73450174  | down      |
| 19 | WBGene00045387     | 0.024837692 | -0.705123054 | down      |
| 20 | WBGene00013976     | 0.00236101  | 0.764343148  | up        |
| 21 | WBGene00022876     | 0.041410669 | 0.694816304  | up        |
| 22 | WBGene00014130     | 0.049744518 | -0.590658089 | down      |
| 23 | WBGene00000691     | 0.001367021 | -0.722610974 | down      |
| 24 | WBGene00020258     | 0.038519163 | 0.601895899  | up        |
| 25 | WBGene00002199     | 0.001514465 | -0.978109512 | down      |
| 26 | WBGene00000740     | 0.010209683 | -0.838054526 | down      |
| 27 | WBGene00000295     | 0.036837134 | -0.594257582 | down      |
| 28 | WBGene00306078     | 0.007909003 | 0.607243465  | up        |
| 29 | WBGene00007341     | 0.011237422 | -0.877030121 | down      |
| 30 | WBGene00016357     | 0.002053083 | 0.630610188  | up        |
| 31 | WBGene00023477     | 1.13E-05    | -0.631173748 | down      |
| 32 | WBGene00010366     | 0.011849831 | 0.59383857   | up        |
| 33 | WBGene00000601     | 0.00935909  | -1.112717949 | down      |

|    |                |             |              |      |
|----|----------------|-------------|--------------|------|
| 34 | WBGene00000703 | 0.000236432 | -1.121692125 | down |
| 35 | WBGene00008042 | 0.028992494 | -0.613124547 | down |
| 36 | WBGene00077559 | 0.046232137 | 0.640488686  | up   |
| 37 | WBGene00019579 | 0.033588333 | -0.594712342 | down |
| 38 | WBGene00009230 | 0.030460668 | 0.669349784  | up   |
| 39 | WBGene00022431 | 0.048874919 | -0.679214085 | down |
| 40 | WBGene00044178 | 0.01979812  | 0.645714276  | up   |
| 41 | WBGene00007490 | 0.025968478 | -0.841649237 | down |
| 42 | WBGene00004218 | 0.035535454 | -0.74518736  | down |
| 43 | WBGene00020175 | 0.027645786 | 0.814136853  | up   |
| 44 | WBGene00000853 | 0.02587592  | -0.692066609 | down |
| 45 | WBGene00269434 | 0.040441469 | 0.608185708  | up   |
| 46 | WBGene00020435 | 0.034919359 | 0.736661694  | up   |
| 47 | WBGene00001718 | 0.019270125 | -0.647530526 | down |
| 48 | WBGene00005444 | 0.020941255 | 0.742646711  | up   |
| 49 | WBGene00044588 | 0.004924242 | 0.701676902  | up   |
| 50 | WBGene00015991 | 0.000114596 | 1.254461829  | up   |
| 51 | WBGene00017013 | 0.004099567 | -0.923543887 | down |
| 52 | WBGene00016988 | 0.010803754 | 0.712480116  | up   |
| 53 | WBGene00017556 | 0.016180098 | 0.630721914  | up   |
| 54 | WBGene00022445 | 0.006930794 | -0.641542721 | down |
| 55 | WBGene00009685 | 0.037717305 | 0.62185041   | up   |
| 56 | WBGene00019587 | 0.019927936 | 0.684776822  | up   |
| 57 | WBGene00011578 | 0.046109793 | -0.654676579 | down |
| 58 | WBGene00003112 | 0.018973267 | -0.696836459 | down |
| 59 | WBGene00008534 | 0.028891958 | 0.598671151  | up   |
| 60 | WBGene00002227 | 0.04398528  | -0.586292782 | down |
| 61 | WBGene00021120 | 0.003990561 | -1.040667253 | down |
| 62 | WBGene00018548 | 0.00832149  | 0.791823836  | up   |
| 63 | WBGene00017227 | 0.007528309 | -0.805037476 | down |
| 64 | WBGene00016329 | 0.006235124 | -0.81115553  | down |
| 65 | WBGene00010034 | 0.00095333  | 0.825369462  | up   |
| 66 | WBGene00014063 | 0.011002876 | -0.600538878 | down |
| 67 | WBGene00007866 | 0.003209996 | -0.732171758 | down |
| 68 | WBGene00007285 | 0.023732822 | -0.693435917 | down |

|     |                |             |              |      |
|-----|----------------|-------------|--------------|------|
| 69  | WBGene00017802 | 0.017530982 | 0.769128411  | up   |
| 70  | WBGene00010957 | 0.016062219 | 1.128008059  | up   |
| 71  | WBGene00007320 | 0.021503158 | 0.64596414   | up   |
| 72  | WBGene00020743 | 0.034878158 | 0.798059617  | up   |
| 73  | WBGene00017938 | 0.026540349 | -0.649219835 | down |
| 74  | --             | 0.000610043 | 0.606587188  | up   |
| 75  | WBGene00020635 | 0.002939064 | 1.456246883  | up   |
| 76  | WBGene00003684 | 0.013117939 | 0.65173523   | up   |
| 77  | WBGene00017720 | 0.028644468 | 0.621288165  | up   |
| 78  | WBGene00011800 | 0.000304915 | 1.146073559  | up   |
| 79  | WBGene00021927 | 0.000700108 | -0.69463254  | down |
| 80  | WBGene00000594 | 0.000981867 | -0.755780637 | down |
| 81  | WBGene00000667 | 0.018351749 | -0.861740648 | down |
| 82  | WBGene00016037 | 0.000146592 | 1.318727438  | up   |
| 83  | WBGene00005092 | 0.033749101 | -0.671927377 | down |
| 84  | WBGene00018468 | 0.014552979 | 0.742270092  | up   |
| 85  | WBGene00007899 | 0.004794497 | 0.721768477  | up   |
| 86  | WBGene00000602 | 7.84E-06    | -1.347755237 | down |
| 87  | WBGene00019648 | 0.003928311 | -0.858843897 | down |
| 88  | WBGene00003879 | 0.006553228 | -0.758834373 | down |
| 89  | WBGene00017710 | 0.042850652 | -0.675355403 | down |
| 90  | WBGene00000653 | 0.018463918 | -1.107488778 | down |
| 91  | WBGene00013187 | 0.010856992 | -0.797138531 | down |
| 92  | WBGene00010214 | 0.007581148 | 0.621352313  | up   |
| 93  | WBGene00017489 | 0.009751973 | 0.828959699  | up   |
| 94  | WBGene00022888 | 0.033392515 | 0.746176106  | up   |
| 95  | WBGene00021362 | 0.04111661  | -0.61978677  | down |
| 96  | WBGene00014820 | 0.000546323 | 0.650693239  | up   |
| 97  | WBGene00019086 | 0.019370752 | 0.619345401  | up   |
| 98  | WBGene00010136 | 0.015925853 | 0.656084049  | up   |
| 99  | WBGene00016054 | 0.016020419 | 0.926854391  | up   |
| 100 | WBGene00000712 | 0.000454392 | -0.986483492 | down |
| 101 | WBGene00021374 | 0.046891616 | 0.661481943  | up   |
| 102 | WBGene00000401 | 0.019380848 | -0.683942163 | down |
| 103 | WBGene00023414 | 0.001038489 | -0.72818477  | down |

|     |                |             |              |      |
|-----|----------------|-------------|--------------|------|
| 104 | WBGene00013785 | 0.045176337 | 0.635208211  | up   |
| 105 | WBGene00009842 | 0.001721407 | -0.912265851 | down |
| 105 | WBGene00021625 | 0.041883533 | -0.735902185 | down |
| 107 | WBGene00011672 | 0.001819124 | 0.758038796  | up   |
| 108 | WBGene00009416 | 0.003693526 | 0.759894161  | up   |
| 109 | WBGene00219859 | 0.036245785 | -0.593296125 | down |
| 110 | WBGene00008235 | 0.048585121 | 0.624976577  | up   |
| 111 | WBGene00000525 | 0.004196818 | -0.689903536 | down |
| 112 | WBGene00007121 | 0.005099528 | 0.721422283  | up   |
| 113 | WBGene00016356 | 0.040617068 | -0.691777691 | down |
| 114 | WBGene00304992 | 0.008840706 | -0.827217561 | down |
| 115 | WBGene00012786 | 0.001275184 | 0.634049933  | up   |
| 116 | WBGene00012916 | 0.017007595 | 0.603893495  | up   |
| 117 | WBGene00006684 | 0.014486561 | 0.716289802  | up   |
| 118 | WBGene00000599 | 0.044710827 | -0.61527646  | down |
| 119 | WBGene00017597 | 0.031381252 | 0.605424572  | up   |
| 120 | WBGene00000526 | 0.021429666 | -0.620697945 | down |
| 121 | WBGene00015115 | 0.012326153 | 0.659237141  | up   |
| 122 | WBGene00020069 | 0.010211526 | -0.784563183 | down |
| 123 | WBGene00017287 | 0.013828755 | -1.000536318 | down |
| 124 | WBGene00003533 | 0.003913208 | -0.928775462 | down |
| 125 | WBGene00008529 | 0.002780886 | 0.775482676  | up   |
| 126 | WBGene00001986 | 0.034551196 | 0.593990781  | up   |
| 127 | WBGene00021007 | 0.000632703 | 0.692889571  | up   |
| 128 | WBGene00077756 | 0.037192261 | 0.599869875  | up   |
| 129 | WBGene00010747 | 0.031846827 | -0.609565882 | down |
| 130 | WBGene00018442 | 0.008094768 | -1.005975818 | down |
| 131 | WBGene00006628 | 9.35E-05    | 1.116935391  | up   |
| 132 | WBGene00012953 | 0.015125753 | 0.699268166  | up   |
| 133 | WBGene00043994 | 0.011959234 | 0.751445841  | up   |
| 134 | WBGene00010242 | 0.034311049 | -0.600827318 | down |
| 135 | WBGene00013155 | 0.007625807 | 0.737210979  | up   |
| 136 | WBGene00018748 | 0.00864016  | -0.75919041  | down |
| 137 | WBGene00007916 | 0.026671024 | -0.690388641 | down |
| 138 | WBGene00012138 | 0.037204411 | 0.729847618  | up   |

|     |                |             |              |      |
|-----|----------------|-------------|--------------|------|
| 139 | WBGene00013700 | 0.023928063 | 0.592314459  | up   |
| 140 | WBGene00000616 | 0.000547888 | -1.282870399 | down |
| 141 | WBGene00013513 | 0.011081148 | -0.669492822 | down |
| 142 | WBGene00010219 | 0.000180366 | -0.770065004 | down |
| 143 | WBGene00269425 | 0.043363928 | -0.666774728 | down |
| 144 | WBGene00022765 | 0.000519896 | 0.590592081  | up   |
| 145 | WBGene00001246 | 0.003377035 | 0.782170819  | up   |
| 146 | WBGene00002184 | 0.019526483 | -0.622010424 | down |
| 147 | WBGene00020747 | 0.010494129 | -0.625062445 | down |
| 148 | WBGene00000720 | 0.037537894 | -1.242349438 | down |
| 149 | WBGene00012123 | 0.005161595 | 0.744221899  | up   |
| 150 | WBGene00008651 | 0.042913117 | -0.598817224 | down |
