# Supplementary material for: Ganoderma lucidum methyl ganoderate E extends lifespan and modulates aging-related indicators in Caenorhabditis elegans
Source: Royal Society of Chemistry journal article supplement (doi:10.1039/d3fo04166b), 2023-12-01
Supplement: d3fo04166b6.pdf [file d3fo04166b6.pdf]

**Table S4.** Genes affected by MGE according to RNA-seq data that are related to other aging-linked neuron-linked genes

| WormBase ID    | Gene                                      | Regulation      | Genes/Pathways/Diseases implicated                                                                                                                                                                                                                                                            |
|----------------|-------------------------------------------|-----------------|-----------------------------------------------------------------------------------------------------------------------------------------------------------------------------------------------------------------------------------------------------------------------------------------------|
| WBGene00045265 | <b><i>K10C2.8</i></b>                     | -0.91397 (Down) | Affected by several genes including <i>daf-16</i> ; <i>daf-2</i> ; and <i>daf-12</i> based on microarray and RNA-seq studies. Is also affected by eleven chemicals including Ethanol; Tunicamycin; and D-glucose based on RNA-seq and microarray studies.                                     |
| WBGene00045458 | <b><i>F17B5.8</i></b>                     | -0.76619 (Down) | Affected by several genes including <i>daf-2</i> ; <i>skn-1</i> ; and <i>hsf-1</i> based on proteomic; tiling array; RNA-seq; and microarray studies. Is also affected by seventeen chemicals including tryptophan; Tunicamycin; and sodium arsenite based on microarray and RNA-seq studies. |
| WBGene00011171 | <b><i>R09E10.1</i></b>                    | 0.618172 (up)   | Affected by several genes including <i>daf-16</i> ; <i>daf-2</i> ; and <i>age-1</i> based on microarray and RNA-seq studies. Is affected by thirteen chemicals including methylmercuric chloride; rotenone; and manganese chloride based on microarray and RNA-seq studies.                   |
| WBGene00023477 | <b><i>nspc-1</i></b>                      | -0.63117 (Down) | Affected by several genes including <i>daf-16</i> ; <i>daf-2</i> ; and <i>eat-2</i> based on RNA-seq and microarray studies. Is affected by fifteen chemicals including Ethanol; rotenone; and mianserin based on RNA-seq and microarray studies                                              |
| WBGene00022431 | <b><i>set-33</i></b><br><b>pseudogene</b> | -0.67921 (Down) | Affected by several genes including <i>daf-16</i> ; <i>daf-12</i> ; and <i>eat-2</i> based on RNA-seq and microarray studies. Is affected by five chemicals including                                                                                                                         |

|                |                             |                 |                                                                                                                                                                                                                                                                                                         |
|----------------|-----------------------------|-----------------|---------------------------------------------------------------------------------------------------------------------------------------------------------------------------------------------------------------------------------------------------------------------------------------------------------|
|                |                             |                 | Rifampin; Psoralens; and Sirolimus based on RNA-seq and microarray studies.                                                                                                                                                                                                                             |
| WBGene00022445 | <b>Y110A2AL.9</b>           | -0.64154 (Down) | Affected by several genes including <i>daf-16</i> ; <i>daf-2</i> ; and <i>rrf-3</i> based on microarray; RNA-seq; and tiling array studies. Is affected by eighteen chemicals including hydrogen sulfide; rotenone; and stavudine based on microarray and RNA-seq studies.                              |
| WBGene00009685 | <b>F44D12.8</b>             | 0.62185 (up)    | Affected by several genes including <i>daf-16</i> ; <i>daf-2</i> ; and <i>let-60</i> based on microarray; RNA-seq; and tiling array studies. Is affected by seventeen chemicals including methylmercury hydroxide; nicotinic acid; and methylmercuric chloride based on RNA-seq and microarray studies. |
| WBGene00016329 | <b>osr-1</b>                | -0.81116 (Down) | Affected by several genes including <i>daf-16</i> ; <i>daf-2</i> ; and <i>daf-12</i> based on microarray and RNA-seq studies. Is affected by twenty chemicals including Ethanol; methylmercury hydroxide; and 1-methylnicotinamide based on RNA-seq and microarray studies.                             |
| WBGene00007866 | <b>C32H11.3</b>             | -0.73217 (Down) | Affected by several genes including <i>daf-16</i> ; <i>daf-2</i> ; and <i>skn-1</i> based on microarray and RNA-seq studies. Is affected by twenty-three chemicals including tryptophan; 1-methylnicotinamide; and Tunicamycin based on microarray and RNA-seq studies.                                 |
| WBGene00005092 | <b>srd-14</b><br>pseudogene | -0.67193 (Down) | Affected by several genes including <i>daf-16</i> ; <i>daf-2</i> ; and <i>skn-1</i> based on RNA-seq and microarray                                                                                                                                                                                     |

|                |                                     |                 |                                                                                                                                                                                                                                                                                                  |
|----------------|-------------------------------------|-----------------|--------------------------------------------------------------------------------------------------------------------------------------------------------------------------------------------------------------------------------------------------------------------------------------------------|
|                |                                     |                 | studies. Is affected by ten chemicals including 1-methylnicotinamide; rotenone; and Zidovudine based on RNA-seq studies.                                                                                                                                                                         |
| WBGene00003879 | <b><i>ora-1</i></b>                 | -0.75883 (Down) | Affected by several genes including <i>daf-16</i> ; <i>daf-2</i> ; and <i>glp-1</i> based on microarray; tiling array; and RNA-seq studies. Is affected by twenty-seven chemicals including methylmercury hydroxide; 1-methylnicotinamide; and rotenone based on RNA-seq and microarray studies. |
| WBGene00021625 | <b><i>Y47D7A.13</i></b>             | -0.7359 (Down)  | Affected by several genes including <i>daf-16</i> ; <i>daf-2</i> ; and <i>glp-1</i> based on microarray; tiling array; and RNA-seq studies. Is affected by thirty-three chemicals including hydrogen sulfide; Nitric Oxide; and 1-methylnicotinamide based on microarray and RNA-seq studies.    |
| WBGene00017287 | <b><i>F09E5.9</i></b><br>pseudogene | -1.00054 (Down) | Affected by several genes including <i>daf-16</i> ; <i>pgl-1</i> ; and <i>glh-1</i> based on microarray and RNA-seq studies. Is affected by Rifampin and Diazinon based on RNA-seq and microarray studies                                                                                        |
| WBGene00007916 | <b><i>C34C6.3</i></b>               | -0.69039 (Down) | Affected by several genes including <i>daf-2</i> ; <i>skn-1</i> ; and <i>rrf-3</i> based on microarray and RNA-seq studies. Is affected by thirteen chemicals including aldicarb; Ethanol; and D-glucose based on microarray and RNA-seq studies                                                 |
| WBGene00012123 | <b><i>T28D6.3</i></b>               | 0.744222 (up)   | Affected by several genes including <i>daf-16</i> ; <i>daf-2</i> ; and <i>glp-1</i> based on microarray; RNA-seq; proteomic; and studies. Is affected by twenty chemicals including methylmercuric chloride;                                                                                     |

|                |                |               |                                                                                                                                                                                                                                                                                                                                                                                                                                                                                                                                                                                                                                                                                                                                                                               |
|----------------|----------------|---------------|-------------------------------------------------------------------------------------------------------------------------------------------------------------------------------------------------------------------------------------------------------------------------------------------------------------------------------------------------------------------------------------------------------------------------------------------------------------------------------------------------------------------------------------------------------------------------------------------------------------------------------------------------------------------------------------------------------------------------------------------------------------------------------|
|                |                |               | Mercuric Chloride; and rotenone based on microarray and RNA-seq studies                                                                                                                                                                                                                                                                                                                                                                                                                                                                                                                                                                                                                                                                                                       |
| WBGene00016037 | <b>dop-6</b>   | 1.318727 (up) | Predicted to enable G protein-coupled serotonin receptor activity and neurotransmitter receptor activity. Predicted to be involved in G protein-coupled receptor signaling pathway, coupled to cyclic nucleotide second messenger; chemical synaptic transmission; and dopamine receptor signaling pathway. Predicted to be located in dendrite. Predicted to be integral component of plasma membrane. Expressed in several structures, including AVF; SMDVL; head neurons; intestine; and lumbar neurons. Human ortholog(s) of this gene implicated in several diseases, including Alzheimer's disease; Gilles de la Tourette syndrome; antisocial personality disorder; and attention deficit hyperactivity disorder. Is an ortholog of human DRD4 (dopamine receptor D4). |
| WBGene00020635 | <b>ztf-31</b>  | 1.456247 (up) | Expressed in head neurons. Is predicted to encode a protein with the following domain: Zinc finger C2H2-type.                                                                                                                                                                                                                                                                                                                                                                                                                                                                                                                                                                                                                                                                 |
| WBGene00009468 | <b>F36D1.9</b> | 0.836778 (up) | Enriched in neurons based on RNA-seq studies. Is affected by several genes including <i>rrf-3</i> ; <i>pgl-1</i> ; and <i>isp-1</i> based on microarray and RNA-seq studies. Is affected by rotenone and Doxycycline based on RNA-seq studies.                                                                                                                                                                                                                                                                                                                                                                                                                                                                                                                                |
| WBGene00022951 | <b>C30E1.9</b> | 0.919972 (up) | Enriched in neurons and retrovesicular ganglion                                                                                                                                                                                                                                                                                                                                                                                                                                                                                                                                                                                                                                                                                                                               |

|  |  |  |                                                                                                                                                                                                                                                                                                                                               |
|--|--|--|-----------------------------------------------------------------------------------------------------------------------------------------------------------------------------------------------------------------------------------------------------------------------------------------------------------------------------------------------|
|  |  |  | based on RNA-seq; single-cell RNA-seq; and microarray studies. Is affected by several genes including <i>daf-2</i> ; <i>daf-12</i> ; and <i>sek-1</i> based on tiling array; RNA-seq; and microarray studies. Is affected by eleven chemicals including 1-methylnicotinamide; rotenone; and paraquat based on RNA-seq and microarray studies. |
|--|--|--|-----------------------------------------------------------------------------------------------------------------------------------------------------------------------------------------------------------------------------------------------------------------------------------------------------------------------------------------------|
